# Supplementary material for: Improved protocol for metabolite extraction and identification of respiratory quinones in extremophilic Archaea grown on mineral materials
Source: Front Microbiol. 2025 Jan 8;15:1473270. doi: 10.3389/fmicb.2024.1473270 (PMC11750793; doi:10.3389/fmicb.2024.1473270)
Supplement: Supplementary file 3 [file Table_2.xlsx]

## Sheet: Mass data interpretation
	m/z	A1		A2		A3		B1		B2		B3		C1		C2		C3
Formula	[M + H]+ / *[M + Na]+	Integrated Peak Area	RT	Integrated Peak Area	RT	Integrated Peak Area	RT	Integrated Peak Area	RT	Integrated Peak Area	RT	Integrated Peak Area	RT	Integrated Peak Area	RT	Integrated Peak Area	RT	Integrated Peak Area	RT	Organic/Aqueous Fraction	Data processing	Annotated metabolite	Biological function	Structural category	Functional category		Structural categories		Functional categories		Biological functions
C29H44O2S2	*511.26727	NA	NA	7573	10.84	7577	10.84	9794	10.84	26315	10.84	18441	10.84	18739	10.84	17108	10.84	32179	10.84	Organic Fraction	MetaboScape®	CQ4:1	energetic metabolism	quinone	respiratory electron carrier		quinones	9	protein-building blocks	18	energetic metabolism	14
C34H54O2S2	*581.34476	35220	8.91	37424	8.91	52663	8.91	30187	8.91	51093	8.91	38470	8.91	41431	8.91	27861	8.91	52770	8.91	Organic Fraction	MetaboScape®	CQ5:1	energetic metabolism	quinone	respiratory electron carrier		amino acids	19	tolerance and resistance to copper toxicity	2	anabolism/catabolism	29
C29H46O2S	459.328	34724	14.07	41716	14.07	31496	14.07	7817	14.07	9674	14.07	NA	NA	8954	14.07	NA	NA	8608	14.07	Organic Fraction	MetaboScape®	SQ4:0	energetic metabolism	quinone	respiratory electron carrier		carbohydrates	11	adaptation to extreme environmental conditions	5	biofilm formation	3
C29H44O2S	457.314	511817	15.1	1434065	15.1	919311	15.1	57215	15.1	203573	15.1	170846	15.1	NA	NA	NA	NA	276529	15.1	Organic Fraction	MetaboScape®	SQ4:1	energetic metabolism	quinone	respiratory electron carrier		keto acids	2	carbohydrate metabolism	9	cell-cell interactions	3
C34H56O2S	529.407	62538	15.41	107978	15.41	47545	15.41	34896	15.41	63098	15.41	55546	15.41	31208	15.41	24154	15.41	31052	15.41	Organic Fraction	MetaboScape®	SQ5:0	energetic metabolism	quinone	respiratory electron carrier		lactones	2	carbohydrate metabolism (ED- specific)	3	metal complexation	1
C34H54O2S	527.391	38563	15.96	50315	15.96	29329	15.96	24551	15.96	26497	15.96	24822	15.96	37375	15.96	28462	15.96	33602	15.96	Organic Fraction	MetaboScape®	SQ5:1	energetic metabolism	quinone	respiratory electron carrier		monocarboxylic acid	1	tryptophan biosynthesis	1	∑	50
C33H50O2S2	543.332	28401	15.93	98835	15.93	92433	15.93	20569	15.93	21633	15.93	NA	NA	29245	15.93	17220	15.93	57371	15.93	Organic Fraction	MetaboScape®	BDTQ5:0	energetic metabolism	quinone	respiratory electron carrier		pterine	1	thiamine biosynthesis	1
C19H30O4	323.222	183006	14.1	150604	14.12	155329	14.11	197977	14.11	176623	14.12	186897	14.12	135129	14.11	181179	14.11	170950	14.11	Organic Fraction	DataAnalysis 4.4	decylubiquinone	energetic metabolism	quinone	thiosulfate:quinone oxidoreductase (DoxD)		dipeptide	1	cell-cell interactions	2
C19H32O4	325.237	1506541	14.71	831815	14.74	2115533	14.71	1703934	14.71	1372618	14.72	1850341	14.72	1934315	14.72	2445977	14.71	2198223	14.72	Organic Fraction	DataAnalysis 4.4	decylubiquinol	energetic metabolism	quinone	thiosulfate:quinone oxidoreductase (DoxD)		modified amino acid	1	biofilm formation	3
C3H7NO3	106.05	15229	1.92	28599	1.93	12381	1.94	24684	1.91	40361	1.94	37908	1.92	23271	1.93	28042	1.95	44528	1.95	Aqueous Fraction	DataAnalysis 4.4	serine	anabolism/catabolism	amino acid	protein building block		aldehyde	1	enzyme cofactor	3
C5H9NO2	116.071	602663	0.63	992673	0.63	1570000	0.64	592411	0.63	1371321	0.63	875771	0.62	789262	0.63	634622	0.63	892113	0.63	Aqueous Fraction	DataAnalysis 4.4	proline	anabolism/catabolism	amino acid	protein building block		∑	48	respiratory chain electron carriers	7
C5H11NO2	118.086	755843	0.6	1513347	0.6	2017584	0.6	720569	0.6	1569761	0.6	1282931	0.6	917494	0.6	884613	0.6	1608930	0.6	Aqueous Fraction	DataAnalysis 4.4	valine	anabolism/catabolism	amino acid	protein building block				∑	54
C4H9NO3	120.066	252390	2.1	241501	2.1	318874	2.11	307612	2.09	380292	2.11	303579	2.1	509068	2.1	526185	2.12	499538	2.12	Aqueous Fraction	DataAnalysis 4.4	threonine	anabolism/catabolism	amino acid	protein building block
C6H13NO2	132.102	6237950	1.36	8007443	1.38	8651027	1.39	6726661	1.36	8475034	1.39	8037027	1.38	6224209	1.36	6980981	1.38	8059173	1.38	Aqueous Fraction	DataAnalysis 4.4	leucine/isoleucine	anabolism/catabolism	amino acid	protein building block
C4H8N2O3	133.061	8526	1.13	9711	1.14	12157	1.16	11919	1.13	5466	1.16	11973	1.13	10530	1.16	14658	1.17	8365	1.14	Aqueous Fraction	DataAnalysis 4.4	asparagine	anabolism/catabolism	amino acid	protein building block
C4H7NO4	134.045	30577	0.65	51279	0.64	109582	0.64	31608	0.65	74399	0.64	44788	0.63	32814	0.65	38956	0.65	19210	0.6	Aqueous Fraction	DataAnalysis 4.4	aspartic acid	anabolism/catabolism	amino acid	protein building block
C5H10N2O3	147.076	8894	0.63	32211	0.63	25514	0.62	13866	0.64	39132	0.64	25801	0.63	25882	0.65	16636	0.63	37871	0.65	Aqueous Fraction	DataAnalysis 4.4	glutamine	anabolism/catabolism	amino acid	protein building block
C6H14N2O2	147.113	1115450	0.67	571660	0.64	3527375	0.68	596227	0.66	511865	0.64	262826	0.62	1076430	0.67	42995	0.61	276212	0.63	Aqueous Fraction	DataAnalysis 4.4	lysine	anabolism/catabolism	amino acid	protein building block
C5H9NO4	148.06	341401	0.63	683282	0.64	1235750	0.63	584583	0.63	1787171	0.64	651532	0.63	993351	0.69	852571	0.63	1139598	0.63	Aqueous Fraction	DataAnalysis 4.4	glutamic acid	anabolism/catabolism	amino acid	protein building block
C5H11NO2S	150.058	81589	0.74	85033	0.75	251858	0.75	73277	0.75	142046	0.75	78897	0.74	94772	0.74	102157	0.76	130355	0.75	Aqueous Fraction	DataAnalysis 4.4	methionine	anabolism/catabolism	amino acid	protein building block & tolerance and resistance to copper toxicity
C6H9N3O2	156.077	365088	1.13	540914	1.15	868691	1.15	372809	1.13	659657	1.16	567957	1.13	362964	1.15	573159	1.17	675152	1.15	Aqueous Fraction	DataAnalysis 4.4	histidine	anabolism/catabolism	amino acid	protein building block & tolerance and resistance to copper toxicity
C9H11NO2	166.086	3937451	1.9	4553296	1.9	5094656	1.91	4272046	1.89	4971625	1.9	4791098	1.9	4085836	1.9	4265527	1.91	4741892	1.92	Aqueous Fraction	DataAnalysis 4.4	phenylalanine	anabolism/catabolism	amino acid	protein building block
C6H14N4O2	175.119	4144536	0.83	4131886	0.78	4834158	0.87	4638448	0.83	4874065	0.86	4715175	0.8	5154681	0.9	2851047	0.72	5361027	0.87	Aqueous Fraction	DataAnalysis 4.4	arginine	anabolism/catabolism	amino acid	protein building block
C9H11NO3	182.081	282236	1.13	578776	1.14	802960	1.15	250933	1.13	661713	1.15	508612	1.13	265050	1.14	617481	1.16	507371	1.15	Aqueous Fraction	DataAnalysis 4.4	tyrosine	anabolism/catabolism	amino acid	protein building block
C11H12N2O2	205.097	11214	1.69	8653	1.69	13504	1.69	19405	1.67	25811	1.7	21190	1.68	17369	1.69	25989	1.71	20580	1.7	Aqueous Fraction	DataAnalysis 4.4	tryptophan	anabolism/catabolism	amino acid	protein building block
C6H12N2O4S2	241.031	71961	12.28	93678	12.28	58721	12.28	88077	12.29	76079	12.28	66963	12.29	75956	12.28	94374	12.28	99213	12.29	Aqueous Fraction	DataAnalysis 4.4	cysteine	anabolism/catabolism	amino acid	protein building block
C12H21N3O3	256.166	375040	1.6	371560	1.61	395426	1.61	326537	1.59	423125	1.62	354468	1.59	441255	1.6	362675	1.63	467104	1.62	Aqueous Fraction	DataAnalysis 4.4	pyrrolysine	anabolism/catabolism	amino acid	protein building block
C3H5O6P	168.99	NA	NA	NA	NA	35361	0.49	72155	0.51	79767	0.51	14766	0.53	66420	0.5	17718	0.53	67955	0.52	Organic Fraction	DataAnalysis 4.4	phosphoenolpyruvate	energetic metabolism	monocarboxylic acid	central carbon metabolism
C5H10O4	135.065	87303	0.64	87116	0.64	150975	0.67	108617	0.63	74782	0.65	61638	0.66	45100	0.62	47833	0.61	75054	0.62	Organic Fraction	DataAnalysis 4.4	2-deoxy-D-ribose	anabolism/catabolism	carbohydrate	central carbon metabolism
C5H10O5	*173.0420	161332	0.63	73803	0.62	108287	0.63	130353	0.61	514856	0.61	459325	0.61	109283	0.61	230531	0.6	160591	0.6	Organic Fraction	DataAnalysis 4.4	ribose	anabolism/catabolism	carbohydrate	central carbon metabolism
C6H12O5	165.076	176639	0.64	234968	0.62	577972	0.64	383914	0.62	91507	0.62	227697	0.64	134628	0.62	403934	0.61	333158	0.61	Organic Fraction	DataAnalysis 4.4	2-deoxy-D-glucose	anabolism/catabolism	carbohydrate	central carbon metabolism
C3H7O6P	171.005	NA	NA	245526	0.82	221176	0.91	61113	0.5	34595	0.5	7566	0.49	29123	0.5	55660	0.5	55770	0.49	Organic Fraction	DataAnalysis 4.4	D-glyceraldehyde-3-phosphate	energetic metabolism & anabolism/catabolism	aldehyde	central carbon metabolism & tryptophan biosynthesis & thiamine biosynthesis
C6H10O6	*201.0370	135305	0.65	44399	0.65	40254	0.65	50121	0.65	NA	NA	132310	0.64	119314	0.65	157490	0.64	277020	0.65	Organic Fraction	DataAnalysis 4.4	2-keto-3-deoxygluconate	energetic metabolism	keto acid	Entner-Doudoroff pathway
C6H13NO5	180.087	NA	NA	47868	0.97	57422	0.98	9369	0.98	20598	0.96	21022	0.98	27139	0.97	7588	0.95	42613	0.96	Organic Fraction	DataAnalysis 4.4	D-glucosamine/D-galactosamine	anabolism/catabolism	carbohydrate	central carbon metabolism
C6H12O6	181.071	4913	0.57	30375	0.58	41399	0.58	53538	0.58	16993	0.57	28236	0.58	9232	0.58	10725	0.58	40286	0.58	Organic Fraction	DataAnalysis 4.4	hexose	anabolism/catabolism & biofilm formation	carbohydrate	biofilm formation
C6H10O7	195.05	198834	5.25	166735	5.24	590718	5.15	160679	5.17	328723	5.17	214103	5.21	882222	5.21	256306	5.23	389752	5.23	Organic Fraction	DataAnalysis 4.4	D-glucuronic acid/D-galacturonic acid	energetic metabolism	carbohydrate	central carbon metabolism
C6H11O7	196.058	287366	5.4	531149	5.34	819103	5.28	240347	5.26	630390	5.27	650061	5.28	318856	5.28	326982	5.26	379554	5.16	Organic Fraction	DataAnalysis 4.4	D-gluconate/D-galactonate	energetic metabolism	carbohydrate	Entner-Doudoroff pathway
C8H15NO6	222.087	177621	2.38	198869	2.39	284439	2.36	166223	2.38	213187	2.38	151769	2.39	310716	2.38	551062	2.38	248584	2.34	Organic Fraction	DataAnalysis 4.4	N-acetyl-D-glucosamine/N-acetyl-D-galactosamine	biofilm formation & cell-cell interactions	carbohydrate	quorum sensing & biofilm formation & adaptations to extreme environmental conditions
C6H8O9P	*277.9798	NA	NA	5170	9.7	8077	9.7	NA	NA	NA	NA	13586	8.49	NA	NA	11004	9.74	17713	9.7	Organic Fraction	DataAnalysis 4.4	2-dehydro-3-deoxy-6-phospho-D-gluconate	energetic metabolism	carbohydrate	central carbon metabolism
C6H11O9P	259.021	92331	0.58	43284	0.6	NA	NA	14496	0.58	289002	0.58	422976	0.58	10759	0.49	68578	0.5	40262	0.49	Organic Fraction	DataAnalysis 4.4	2-keto-3-deoxy-6-phosphogluconate	energetic metabolism	keto acid	Entner-Doudoroff pathway
C3H8O10P2	*288.9485	NA	NA	109614	9.59	110705	9.58	14193	9.56	42659	9.52	30194	9.57	25562	9.54	77976	9.58	81750	9.59	Organic Fraction	DataAnalysis 4.4	1,3-bisphosphoglycerate	energetic metabolism	carbohydrate	central carbon metabolism
C11H19NO8	294.118	NA	NA	227379	7.54	182919	7.5	52864	7.67	739468	7.4	153989	7.51	194089	7.54	108187	7.24	250269	7.48	Organic Fraction	DataAnalysis 4.4	N-acetylmuramic acid	biofilm formation	carbohydrate	biofilm formation & adaptations to extreme environmental conditions
C9H17NO3	188.128	83108	1.11	683972	1.12	1658077	1.12	89543	1.12	103627	1.12	283189	1.12	33321	1.1	51973	1.1	226661	1.1	Organic Fraction	DataAnalysis 4.4	8-amino-7-oxononanoic acid	anabolism/catabolism	amino acid	adaptations to extreme environmental conditions
C11H22N2O3	231.17	578850	1.65	1067990	1.66	2442285	1.65	511884	1.66	337799	1.65	961977	1.65	314156	1.64	346980	1.64	573767	1.62	Organic Fraction	DataAnalysis 4.4	leucylvaline	anabolism/catabolism	dipeptide	adaptations to extreme environmental conditions
C10H14MoN5O8PS2	525.915	NA	NA	9545	13.48	11951	13.45	NA	NA	8517	13.46	4237	13.46	457	13.46	3192	13.43	3471	13.46	Organic Fraction	DataAnalysis 4.4	MoCo II	metal complexation	pterine	molybdenum cofactor
C4H6O3	103.039	49930	0.64	90826	0.64	187206	0.66	76890	0.63	54194	0.63	36558	0.65	74712	0.62	68484	0.62	141194	0.62	Organic Fraction	DataAnalysis 4.4	lactone	cell-cell interactions	lactone	quorum sensing
C10H15NO4	214.107	147911	2.92	160135	2.95	186241	2.86	137647	2.91	337367	2.91	266625	2.92	323312	2.92	265480	2.91	436177	2.87	Organic Fraction	DataAnalysis 4.4	N-(3-oxohexanoyl)-L-homoserine lactone	cell-cell interactions	lactone	quorum sensing
C15H22N6O5S	399.145	5109823	12.32	5086642	12.34	4903686	12.32	4036175	12.33	4931713	12.33	4637073	12.32	677319	12.33	532823	12.32	822983	12.33	Organic Fraction	DataAnalysis 4.4	S-adenosylmethionine	anabolism/catabolism	modified amino acid	adaptations to extreme environmental conditions
